# Supplementary material for: Constructing hierarchical architectures of Eu3+-doped Mg3B2O6 for tunable luminescent properties
Source: Royal Society of Chemistry journal article supplement (doi:10.1039/c1nj20118b), 2011-01-01
Supplement: c1nj20118b.pdf [file c1nj20118b.pdf]

## Supporting Information

### Constructing Hierarchical Architectures of $\text{Eu}^{3+}$ -doped $\text{Mg}_3\text{B}_2\text{O}_6$ for Tunable Luminescent Properties

*Hongchang Pang, Guiling Ning,\* Weitao Gong, Junwei Ye and Yuan Lin, Xinai Pan*

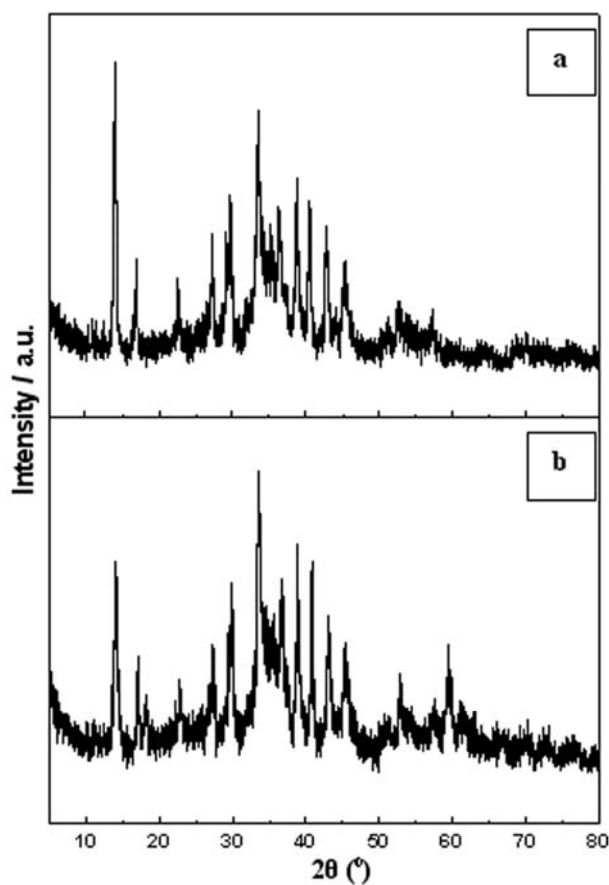

**Figure S1.** XRD pattern of flower-like (a) and urchin-like (b)  $\text{MgBO}_2(\text{OH})$ .

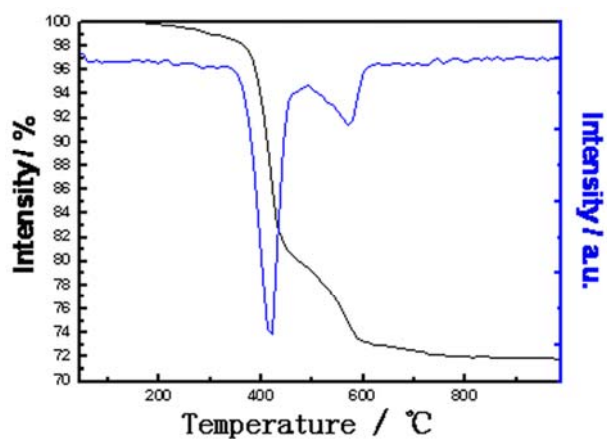

**Figure S2.** TG/TGA curve for precursor  $\text{MgBO}_2(\text{OH})$  from ambient temperature to  $1000^\circ\text{C}$  under  $\text{N}_2$  protection. It indicates that the precursor can be calcinated above  $650^\circ\text{C}$  to transform stable  $\text{Mg}_3\text{B}_2\text{O}_6$ .

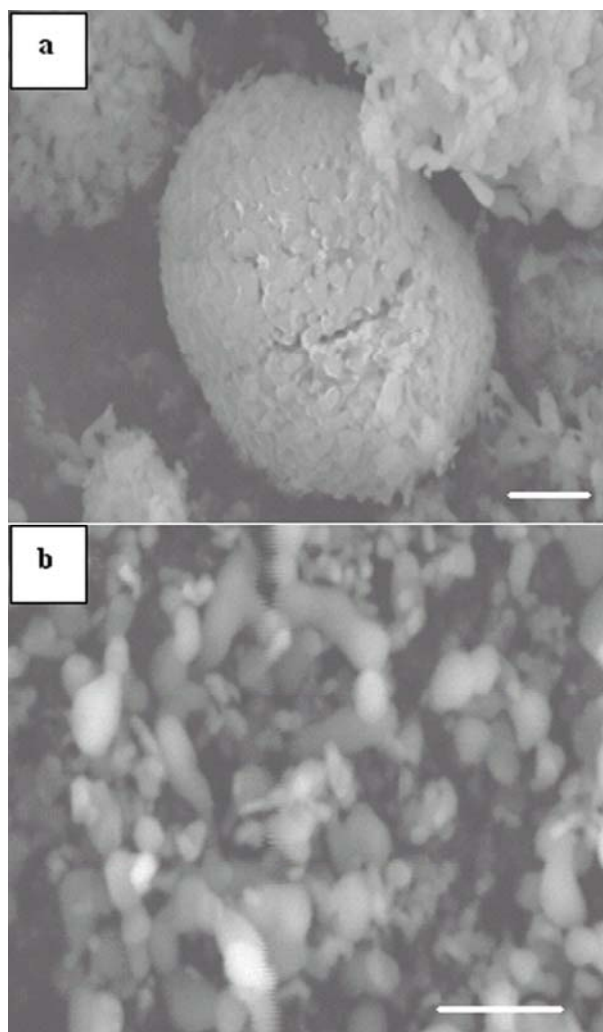

**Figure S3.** SEM images of samples corresponding to flower-like (a) and urchin-like (b)  $\text{Mg}_3\text{B}_2\text{O}_6:\text{Eu}^{3+}$  calcined at 900 °C for 3 h. All bars are 2 $\mu\text{m}$ .

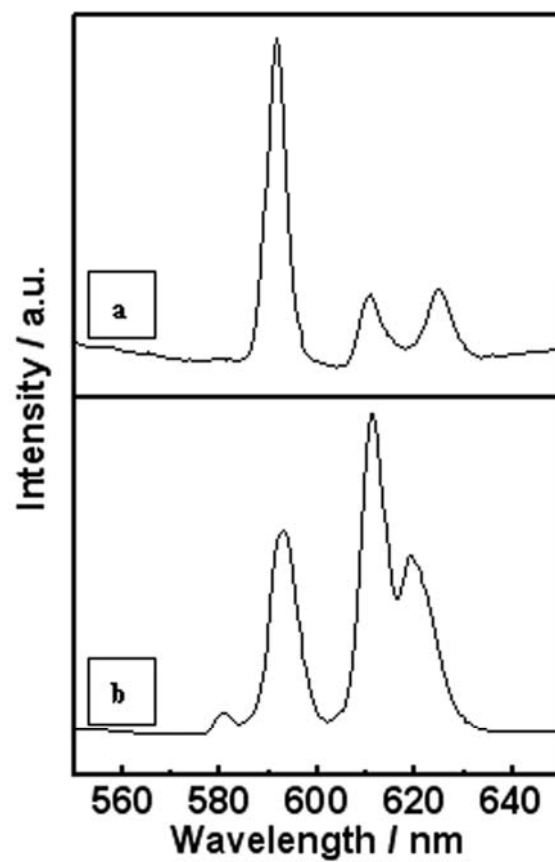

**Figure S4.** PL emission spectra of flower-like (a) and urchin-like (b) MgBO<sub>2</sub>(OH) :Eu<sup>3+</sup>.
